# Supplementary material
Source: MDPI journal article supplement (https://www.mdpi.com/2624-8549/2/1/5)

# checkCIF/PLATON report

Structure factors have been supplied for datablock(s) 1, 1.solv, 2, 3

THIS REPORT IS FOR GUIDANCE ONLY. IF USED AS PART OF A REVIEW PROCEDURE FOR PUBLICATION, IT SHOULD NOT REPLACE THE EXPERTISE OF AN EXPERIENCED CRYSTALLOGRAPHIC REFEREE.

No syntax errors found.      CIF dictionary      Interpreting this report

## Datablock: 1

---

Bond precision:    N- C = 0.0060 A                      Wavelength=0.71073

Cell:                      a=6.6586(7)              b=12.8635(14)              c=17.4187(19)  
                            alpha=90              beta=99.657(3)              gamma=90  
Temperature:              100 K

|                | Calculated                | Reported                  |
|----------------|---------------------------|---------------------------|
| Volume         | 1470.8(3)                 | 1470.8(3)                 |
| Space group    | P 21/n                    | P 1 21/n 1                |
| Hall group     | -P 2yn                    | -P 2yn                    |
| Moiety formula | C10 H20 Cl6 Cu3 N16 O2 S4 | C10 H20 Cl6 Cu3 N16 O2 S4 |
| Sum formula    | C10 H20 Cl6 Cu3 N16 O2 S4 | C10 H20 Cl6 Cu3 N16 O2 S4 |
| Mr             | 928.01                    | 927.98                    |
| Dx,g cm-3      | 2.095                     | 2.095                     |
| Z              | 2                         | 2                         |
| Mu (mm-1)      | 3.024                     | 3.024                     |
| F000           | 922.0                     | 922.0                     |
| F000'          | 926.79                    |                           |
| h,k,lmax       | 8,17,23                   | 8,17,23                   |
| Nref           | 3696                      | 3688                      |
| Tmin,Tmax      | 0.920,0.938               | 0.642,0.746               |
| Tmin'          | 0.683                     |                           |

Correction method= # Reported T Limits: Tmin=0.642 Tmax=0.746  
AbsCorr = MULTI-SCAN

Data completeness= 0.998                      Theta(max)= 28.434

R(reflections)= 0.0494( 2997)              wR2(reflections)= 0.1130( 3688)

S = 1.143                      Npar= 197

---

The following ALERTS were generated. Each ALERT has the format

**test-name\_ALERT\_alert-type\_alert-level.**

Click on the hyperlinks for more details of the test.

---

### Alert level B

PLAT431\_ALERT\_2\_B Short Inter HL..A Contact Cl2 ..S1 . 3.09 Ang.  
1-x,1-y,1-z = 3\_666 Check  
PLAT919\_ALERT\_3\_B Reflection # Likely Affected by the Beamstop ... 1 Check

---

### Alert level C

PLAT222\_ALERT\_3\_C Non-Solv. Resd 1 H Uiso(max)/Uiso(min) Range 7.5 Ratio  
PLAT480\_ALERT\_4\_C Long H...A H-Bond Reported H12A ..S2 . 2.90 Ang.  
PLAT480\_ALERT\_4\_C Long H...A H-Bond Reported H12A ..N6 . 2.68 Ang.  
PLAT480\_ALERT\_4\_C Long H...A H-Bond Reported H1D ..CL3 . 2.86 Ang.  
PLAT480\_ALERT\_4\_C Long H...A H-Bond Reported H1A ..CL1 . 2.93 Ang.  
PLAT906\_ALERT\_3\_C Large K Value in the Analysis of Variance ..... 5.403 Check  
PLAT934\_ALERT\_3\_C Number of (Iobs-Icalc)/SigmaW > 10 Outliers .... 1 Check  
PLAT975\_ALERT\_2\_C Check Calcd Resid. Dens. 0.92A From N6 0.70 eA-3

---

### Alert level G

PLAT002\_ALERT\_2\_G Number of Distance or Angle Restraints on AtSite 3 Note  
PLAT004\_ALERT\_5\_G Polymeric Structure Found with Maximum Dimension 1 Info  
PLAT012\_ALERT\_1\_G No \_shelx\_res\_checksum Found in CIF ..... Please Check  
PLAT083\_ALERT\_2\_G SHELXL Second Parameter in WGHT Unusually Large 6.01 Why ?  
PLAT172\_ALERT\_4\_G The CIF-Embedded .res File Contains DFIX Records 2 Report  
PLAT794\_ALERT\_5\_G Tentative Bond Valency for Cu1 (II) . 2.07 Info  
PLAT794\_ALERT\_5\_G Tentative Bond Valency for Cu2 (II) . 2.05 Info  
PLAT860\_ALERT\_3\_G Number of Least-Squares Restraints ..... 2 Note  
PLAT910\_ALERT\_3\_G Missing # of FCF Reflection(s) Below Theta(Min). 1 Note  
PLAT912\_ALERT\_4\_G Missing # of FCF Reflections Above STh/L= 0.600 6 Note

---

0 **ALERT level A** = Most likely a serious problem - resolve or explain  
2 **ALERT level B** = A potentially serious problem, consider carefully  
8 **ALERT level C** = Check. Ensure it is not caused by an omission or oversight  
10 **ALERT level G** = General information/check it is not something unexpected

1 ALERT type 1 CIF construction/syntax error, inconsistent or missing data  
4 ALERT type 2 Indicator that the structure model may be wrong or deficient  
6 ALERT type 3 Indicator that the structure quality may be low  
6 ALERT type 4 Improvement, methodology, query or suggestion  
3 ALERT type 5 Informative message, check

---

## Datablock: 1.solv

---

Bond precision: C-C = 0.0025 A

Wavelength=0.71073

Cell: a=6.7181(5) b=12.9961(9) c=12.9971(9)  
alpha=64.067(2) beta=79.492(2) gamma=82.134(2)

Temperature: 100 K

|                | Calculated                               | Reported                                 |
|----------------|------------------------------------------|------------------------------------------|
| Volume         | 1001.29(12)                              | 1001.29(12)                              |
| Space group    | P -1                                     | P -1                                     |
| Hall group     | -P 1                                     | -P 1                                     |
| Moiety formula | C10 H20 Cl6 Cu3 N16 O2 S4,<br>4(C2 H3 N) | C10 H20 Cl6 Cu3 N16 O2 S4,<br>4(C2 H3 N) |
| Sum formula    | C18 H32 Cl6 Cu3 N20 O2 S4                | C18 H32 Cl6 Cu3 N20 O2 S4                |
| Mr             | 1092.23                                  | 1092.19                                  |
| Dx,g cm-3      | 1.811                                    | 1.811                                    |
| Z              | 1                                        | 1                                        |
| Mu (mm-1)      | 2.239                                    | 2.239                                    |
| F000           | 549.0                                    | 549.0                                    |
| F000'          | 551.41                                   |                                          |
| h,k,lmax       | 9,18,18                                  | 9,18,18                                  |
| Nref           | 6166                                     | 6158                                     |
| Tmin,Tmax      | 0.734,0.853                              | 0.613,0.746                              |
| Tmin'          | 0.542                                    |                                          |

Correction method= # Reported T Limits: Tmin=0.613 Tmax=0.746  
AbsCorr = MULTI-SCAN

Data completeness= 0.999                      Theta(max)= 30.576

R(reflections)= 0.0209( 5643)              wR2(reflections)= 0.0514( 6158)

S = 1.079                                      Npar= 246

The following ALERTS were generated. Each ALERT has the format  
**test-name\_ALERT\_alert-type\_alert-level.**  
Click on the hyperlinks for more details of the test.

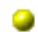

#### Alert level C

|                   |                                           |         |   |            |
|-------------------|-------------------------------------------|---------|---|------------|
| PLAT480_ALERT_4_C | Long H...A H-Bond Reported H1A            | ..S2    | . | 2.94 Ang.  |
| PLAT480_ALERT_4_C | Long H...A H-Bond Reported H1B            | ..CL2   | . | 2.95 Ang.  |
| PLAT480_ALERT_4_C | Long H...A H-Bond Reported H1B            | ..S1    | . | 2.95 Ang.  |
| PLAT480_ALERT_4_C | Long H...A H-Bond Reported H22B           | ..N31   | . | 2.68 Ang.  |
| PLAT480_ALERT_4_C | Long H...A H-Bond Reported H12C           | ..CL3   | . | 2.95 Ang.  |
| PLAT480_ALERT_4_C | Long H...A H-Bond Reported H31A           | ..N2    | . | 2.64 Ang.  |
| PLAT480_ALERT_4_C | Long H...A H-Bond Reported H31C           | ..CL1   | . | 2.98 Ang.  |
| PLAT480_ALERT_4_C | Long H...A H-Bond Reported H1C            | ..CL1   | . | 2.99 Ang.  |
| PLAT976_ALERT_2_C | Check Calcd Resid. Dens. 0.98A            | From O1 |   | -0.44 eA-3 |
| PLAT977_ALERT_2_C | Check Negative Difference Density on H1C  |         |   | -0.44 eA-3 |
| PLAT977_ALERT_2_C | Check Negative Difference Density on H1D  |         |   | -0.33 eA-3 |
| PLAT977_ALERT_2_C | Check Negative Difference Density on H31B |         |   | -0.39 eA-3 |

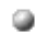

#### Alert level G

|                   |                                                  |        |       |          |
|-------------------|--------------------------------------------------|--------|-------|----------|
| PLAT004_ALERT_5_G | Polymeric Structure Found with Maximum Dimension |        | 1     | Info     |
| PLAT007_ALERT_5_G | Number of Unrefined Donor-H Atoms .....          |        | 2     | Report   |
| PLAT154_ALERT_1_G | The s.u.'s on the Cell Angles are Equal ..(Note) |        | 0.002 | Degree   |
| PLAT232_ALERT_2_G | Hirshfeld Test Diff (M-X) Cu1                    | --N8_c | .     | 6.3 s.u. |
| PLAT232_ALERT_2_G | Hirshfeld Test Diff (M-X) Cu2                    | --Cl1  | .     | 8.1 s.u. |

|                   |                                                  |       |   |           |
|-------------------|--------------------------------------------------|-------|---|-----------|
| PLAT232_ALERT_2_G | Hirshfeld Test Diff (M-X) Cu2                    | --01  | . | 5.8 s.u.  |
| PLAT794_ALERT_5_G | Tentative Bond Valency for Cu1                   | (II)  | . | 2.10 Info |
| PLAT794_ALERT_5_G | Tentative Bond Valency for Cu2                   | (II)  | . | 2.10 Info |
| PLAT910_ALERT_3_G | Missing # of FCF Reflection(s) Below Theta(Min). |       |   | 3 Note    |
| PLAT912_ALERT_4_G | Missing # of FCF Reflections Above STh/L=        | 0.600 |   | 5 Note    |
| PLAT933_ALERT_2_G | Number of OMIT Records in Embedded .res File ... |       |   | 1 Note    |
| PLAT978_ALERT_2_G | Number C-C Bonds with Positive Residual Density. |       |   | 1 Info    |

---

0 **ALERT level A** = Most likely a serious problem - resolve or explain  
 0 **ALERT level B** = A potentially serious problem, consider carefully  
 12 **ALERT level C** = Check. Ensure it is not caused by an omission or oversight  
 12 **ALERT level G** = General information/check it is not something unexpected

1 ALERT type 1 CIF construction/syntax error, inconsistent or missing data  
 9 ALERT type 2 Indicator that the structure model may be wrong or deficient  
 1 ALERT type 3 Indicator that the structure quality may be low  
 9 ALERT type 4 Improvement, methodology, query or suggestion  
 4 ALERT type 5 Informative message, check

---

## Datablock: 2

---

Bond precision: C-C = 0.0020 A                      Wavelength=0.71073  
  
 Cell:                      a=10.1237(5)              b=9.5414(5)              c=14.4784(8)  
                               alpha=90                      beta=93.650(2)              gamma=90  
 Temperature:              100 K

|                | Calculated             | Reported               |
|----------------|------------------------|------------------------|
| Volume         | 1395.69(13)            | 1395.69(13)            |
| Space group    | P 21/n                 | P 1 21/n 1             |
| Hall group     | -P 2yn                 | -P 2yn                 |
| Moiety formula | C12 H20 Cl4 Cu4 N16 S4 | C12 H20 Cl4 Cu4 N16 S4 |
| Sum formula    | C12 H20 Cl4 Cu4 N16 S4 | C12 H20 Cl4 Cu4 N16 S4 |
| Mr             | 912.68                 | 912.64                 |
| Dx,g cm-3      | 2.172                  | 2.172                  |
| Z              | 2                      | 2                      |
| Mu (mm-1)      | 3.729                  | 3.729                  |
| F000           | 904.0                  | 904.0                  |
| F000'          | 908.80                 |                        |
| h,k,lmax       | 13,12,19               | 13,12,19               |
| Nref           | 3490                   | 3486                   |
| Tmin,Tmax      | 0.439,0.827            | 0.484,0.746            |
| Tmin'          | 0.214                  |                        |

Correction method= # Reported T Limits: Tmin=0.484 Tmax=0.746  
 AbsCorr = MULTI-SCAN

Data completeness= 0.999                      Theta(max)= 28.339

R(reflections)= 0.0212( 3181)      wR2(reflections)= 0.0480( 3486)

S = 1.081      Npar= 183

---

The following ALERTS were generated. Each ALERT has the format

**test-name\_ALERT\_alert-type\_alert-level.**

Click on the hyperlinks for more details of the test.

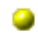

#### Alert level C

|                   |                            |                     |       |       |           |
|-------------------|----------------------------|---------------------|-------|-------|-----------|
| PLAT431_ALERT_2_C | Short Inter HL..A Contact  | Cl2                 | ..S2  | .     | 3.34 Ang. |
|                   |                            | -1/2+x,3/2-y,-1/2+z | =     | 4_575 | Check     |
| PLAT480_ALERT_4_C | Long H...A H-Bond Reported | H2A                 | ..N4  | .     | 2.69 Ang. |
| PLAT480_ALERT_4_C | Long H...A H-Bond Reported | H1B                 | ..CL2 | .     | 2.84 Ang. |
| PLAT480_ALERT_4_C | Long H...A H-Bond Reported | H1B                 | ..CL1 | .     | 2.85 Ang. |
| PLAT480_ALERT_4_C | Long H...A H-Bond Reported | H12B                | ..S2  | .     | 2.95 Ang. |
| PLAT480_ALERT_4_C | Long H...A H-Bond Reported | H12C                | ..CL2 | .     | 2.87 Ang. |

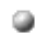

#### Alert level G

|                   |                                                  |             |         |       |           |
|-------------------|--------------------------------------------------|-------------|---------|-------|-----------|
| PLAT232_ALERT_2_G | Hirshfeld Test Diff (M-X)                        | Cu1         | --Cl1   | .     | 7.5 s.u.  |
| PLAT232_ALERT_2_G | Hirshfeld Test Diff (M-X)                        | Cu1         | --Cl2_a | .     | 22.0 s.u. |
| PLAT232_ALERT_2_G | Hirshfeld Test Diff (M-X)                        | Cu2         | --Cl1   | .     | 35.0 s.u. |
| PLAT232_ALERT_2_G | Hirshfeld Test Diff (M-X)                        | Cu2         | --Cl1_a | .     | 62.0 s.u. |
| PLAT432_ALERT_2_G | Short Inter X...Y Contact                        | N2          | ..C21   | .     | 2.98 Ang. |
|                   |                                                  | 1-x,1-y,1-z | =       | 3_666 | Check     |
| PLAT912_ALERT_4_G | Missing # of FCF Reflections Above STh/L=        | 0.600       |         | 4     | Note      |
| PLAT933_ALERT_2_G | Number of OMIT Records in Embedded .res File ... |             |         | 1     | Note      |
| PLAT978_ALERT_2_G | Number C-C Bonds with Positive Residual Density. |             |         | 1     | Info      |

---

0 **ALERT level A** = Most likely a serious problem - resolve or explain  
0 **ALERT level B** = A potentially serious problem, consider carefully  
6 **ALERT level C** = Check. Ensure it is not caused by an omission or oversight  
8 **ALERT level G** = General information/check it is not something unexpected

0 ALERT type 1 CIF construction/syntax error, inconsistent or missing data  
8 ALERT type 2 Indicator that the structure model may be wrong or deficient  
0 ALERT type 3 Indicator that the structure quality may be low  
6 ALERT type 4 Improvement, methodology, query or suggestion  
0 ALERT type 5 Informative message, check

---

## Datablock: 3

---

Bond precision: C-C = 0.0020 A

Wavelength=0.71073

Cell:            a=20.3164(18)      b=6.5444(6)      c=12.8543(11)  
                 alpha=90          beta=109.493(3)      gamma=90

Temperature:    100 K

|                | Calculated        | Reported          |
|----------------|-------------------|-------------------|
| Volume         | 1611.1(2)         | 1611.1(2)         |
| Space group    | C 2/c             | C 1 2/c 1         |
| Hall group     | -C 2yc            | -C 2yc            |
| Moiety formula | C3 H5 Cl2 Cu N4 S | C3 H5 Cl2 Cu N4 S |
| Sum formula    | C3 H5 Cl2 Cu N4 S | C3 H5 Cl2 Cu N4 S |
| Mr             | 263.62            | 263.61            |
| Dx,g cm-3      | 2.174             | 2.174             |
| Z              | 8                 | 8                 |
| Mu (mm-1)      | 3.567             | 3.567             |
| F000           | 1040.0            | 1040.0            |
| F000'          | 1046.00           |                   |
| h,k,lmax       | 26,8,17           | 26,8,17           |
| Nref           | 2020              | 2015              |
| Tmin,Tmax      | 0.804,0.852       | 0.702,0.746       |
| Tmin'          | 0.776             |                   |

Correction method= # Reported T Limits: Tmin=0.702 Tmax=0.746  
AbsCorr = MULTI-SCAN

Data completeness= 0.998                      Theta(max)= 28.354

R(reflections)= 0.0196( 1899)      wR2(reflections)= 0.0461( 2015)

S = 1.166                      Npar= 101

The following ALERTS were generated. Each ALERT has the format

```
test-name ALERT alert-type alert-level.
```

Click on the hyperlinks for more details of the test.

- Alert level C

PLAT978 ALERT 2 C Number C-C Bonds with Positive Residual Density. 0 Info

- Alert level G

|                   |                                                  |       |              |
|-------------------|--------------------------------------------------|-------|--------------|
| PLAT004_ALERT_5_G | Polymeric Structure Found with Maximum Dimension | 2     | Info         |
| PLAT012_ALERT_1_G | No _shelx_res_checksum Found in CIF .....        |       | Please Check |
| PLAT128_ALERT_4_G | Alternate Setting for Input Space Group C2/c     | I2/a  | Note         |
| PLAT232_ALERT_2_G | Hirshfeld Test Diff (M-X) Cu --Cl1 .             | 5.5   | s.u.         |
| PLAT232_ALERT_2_G | Hirshfeld Test Diff (M-X) Cu --N2 .              | 6.5   | s.u.         |
| PLAT232_ALERT_2_G | Hirshfeld Test Diff (M-X) Cu --Cl1_b .           | 6.5   | s.u.         |
| PLAT232_ALERT_2_G | Hirshfeld Test Diff (M-X) Cu --Cl2_c .           | 6.3   | s.u.         |
| PLAT432_ALERT_2_G | Short Inter X...Y Contact N4 ..Cl2               | 2.96  | Ang.         |
|                   | x,-1+y,z =                                       | 1_545 | Check        |
| PLAT434_ALERT_2_G | Short Inter HL..HL Contact Cl1 ..Cl2             | 3.40  | Ang.         |
|                   | x,1+y,z =                                        | 1_565 | Check        |
| PLAT794_ALERT_5_G | Tentative Bond Valency for Cu (II) .             | 1.92  | Info         |
| PLAT910_ALERT_3_G | Missing # of FCF Reflection(s) Below Theta(Min). | 1     | Note         |
| PLAT912_ALERT_4_G | Missing # of FCF Reflections Above STh/L= 0.600  | 4     | Note         |

0 **ALERT level A** = Most likely a serious problem - resolve or explain

0 **ALERT level B** = A potentially serious problem, consider carefully  
1 **ALERT level C** = Check. Ensure it is not caused by an omission or oversight  
12 **ALERT level G** = General information/check it is not something unexpected

1 ALERT type 1 CIF construction/syntax error, inconsistent or missing data  
7 ALERT type 2 Indicator that the structure model may be wrong or deficient  
1 ALERT type 3 Indicator that the structure quality may be low  
2 ALERT type 4 Improvement, methodology, query or suggestion  
2 ALERT type 5 Informative message, check

---

It is advisable to attempt to resolve as many as possible of the alerts in all categories. Often the minor alerts point to easily fixed oversights, errors and omissions in your CIF or refinement strategy, so attention to these fine details can be worthwhile. In order to resolve some of the more serious problems it may be necessary to carry out additional measurements or structure refinements. However, the purpose of your study may justify the reported deviations and the more serious of these should normally be commented upon in the discussion or experimental section of a paper or in the "special\_details" fields of the CIF. checkCIF was carefully designed to identify outliers and unusual parameters, but every test has its limitations and alerts that are not important in a particular case may appear. Conversely, the absence of alerts does not guarantee there are no aspects of the results needing attention. It is up to the individual to critically assess their own results and, if necessary, seek expert advice.

### **Publication of your CIF in IUCr journals**

A basic structural check has been run on your CIF. These basic checks will be run on all CIFs submitted for publication in IUCr journals (*Acta Crystallographica*, *Journal of Applied Crystallography*, *Journal of Synchrotron Radiation*); however, if you intend to submit to *Acta Crystallographica Section C* or *E* or *IUCrData*, you should make sure that full publication checks are run on the final version of your CIF prior to submission.

### **Publication of your CIF in other journals**

Please refer to the *Notes for Authors* of the relevant journal for any special instructions relating to CIF submission.

---

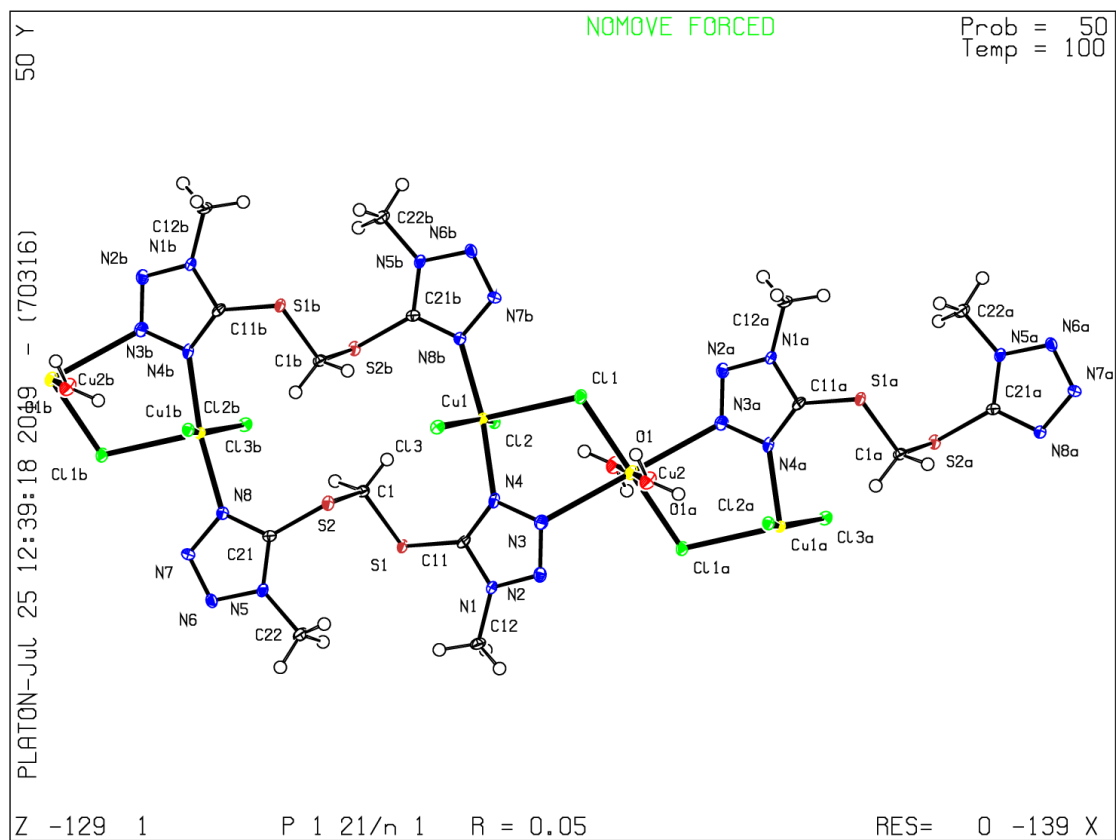



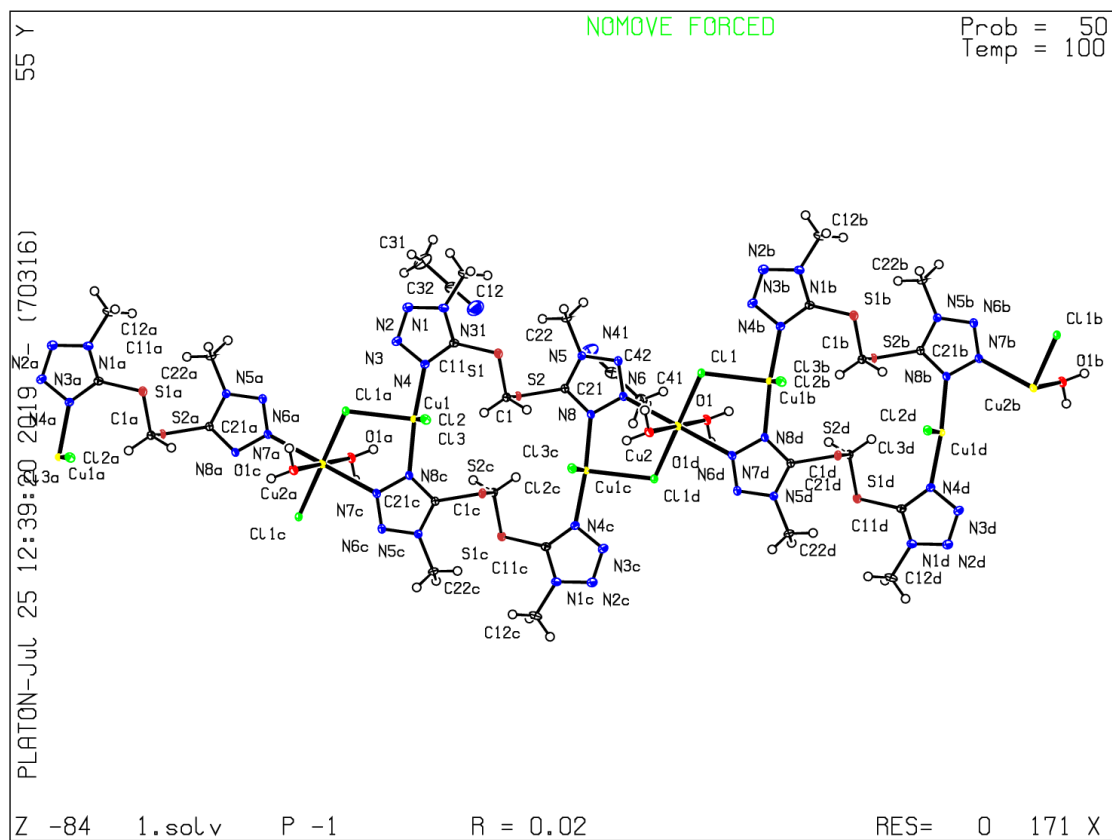

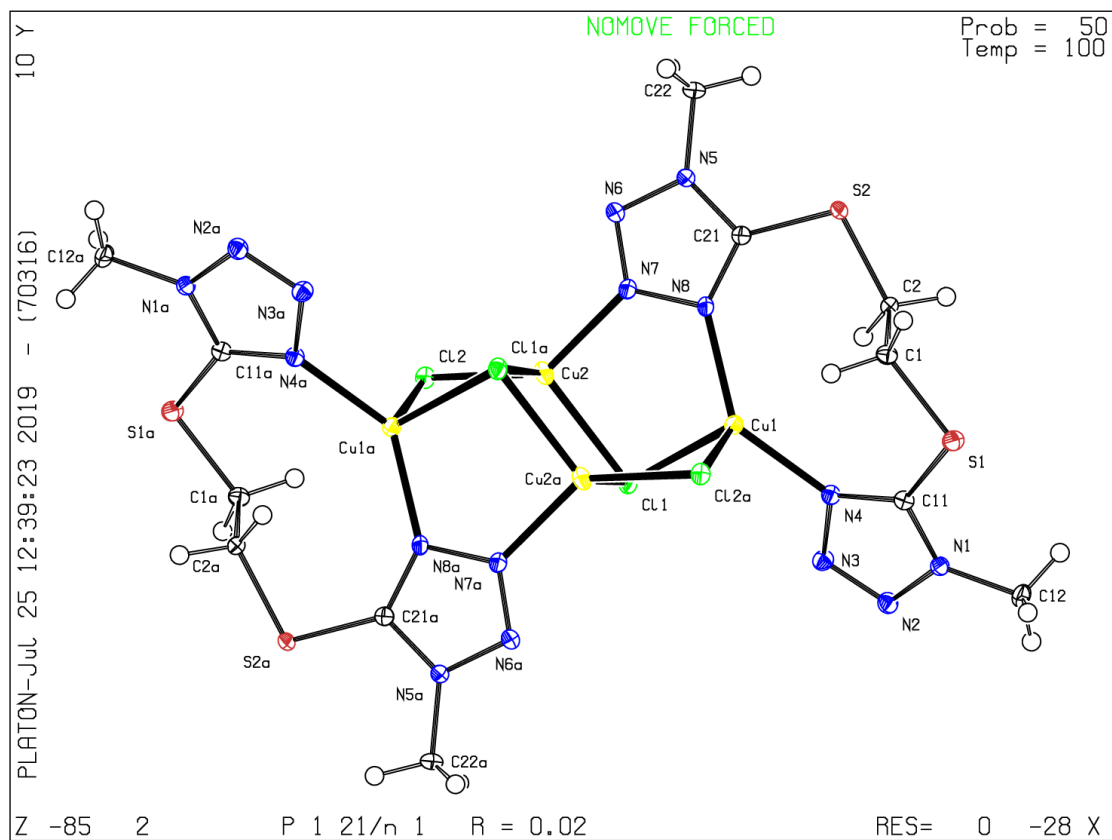

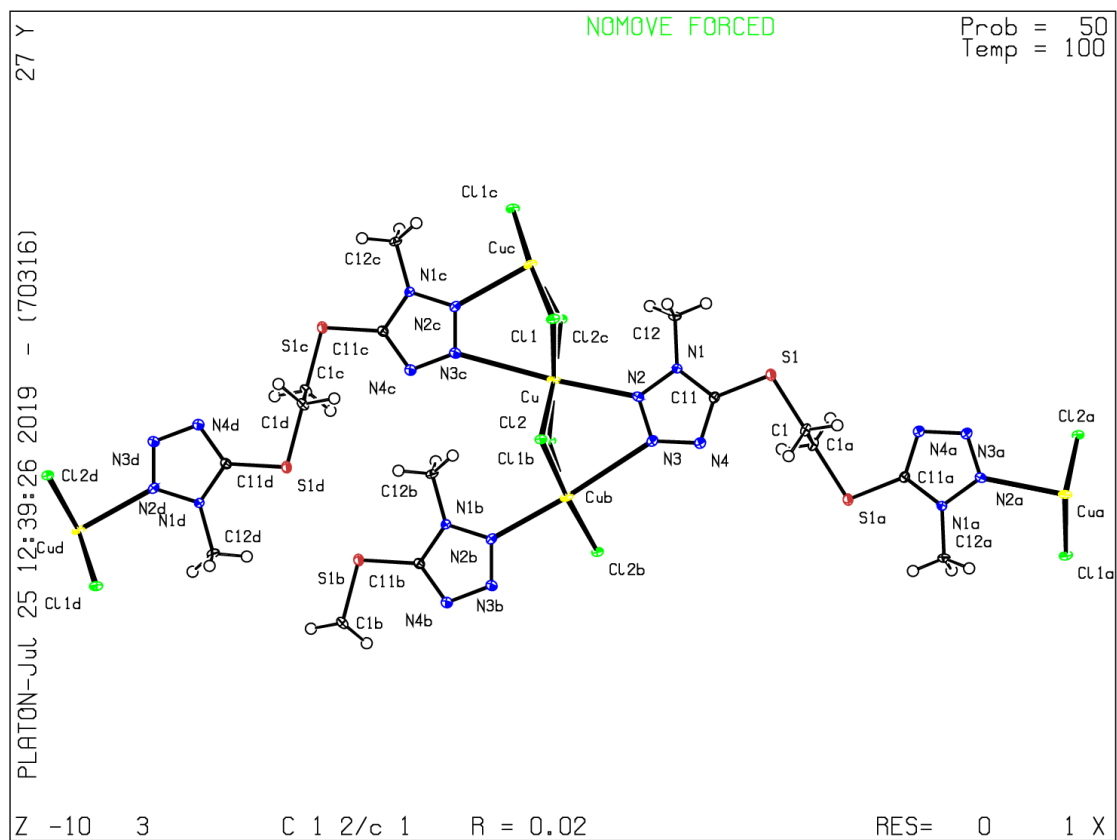

Supplement: s1 [file s1]
