# Supplementary material
Source: MDPI journal article supplement (https://www.mdpi.com/2624-8549/2/1/5)
Supplement: s1 [file s1]

# Metallosupramolecular compounds based on copper(II/I) chloride and two bis-tetrazole organosulfur ligands

Olaya Gómez-Paz<sup>1</sup>, Rosa Carballo<sup>1,\*</sup>, Ana Belén Lago<sup>2,\*</sup>, Ezequiel M. Vázquez-López<sup>1</sup>

<sup>1</sup> Departamento de Química Inorgánica, Instituto de Investigación Sanitaria Galicia Sur (IISGS)- Universidade de Vigo, 36310 Vigo, Galicia, Spain; [rcrial@uvigo.es](mailto:rcrial@uvigo.es)

<sup>2</sup> Departamento de Química, Facultad de Ciencias, Sección Química Inorgánica, Universidad de La Laguna, 38206 La Laguna, Spain; [alagobla@ull.edu.es](mailto:alagobla@ull.edu.es)

\* Correspondence: [rcrial@uvigo.es](mailto:rcrial@uvigo.es) (R.C.) and [alagobla@ull.edu.es](mailto:alagobla@ull.edu.es) (A.B.L.)

## Supplementary material

| Contents:           | Page |
|---------------------|------|
| 1. Characterization | 2    |
| 2. Crystallography  | 4    |

## 1. Characterization

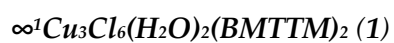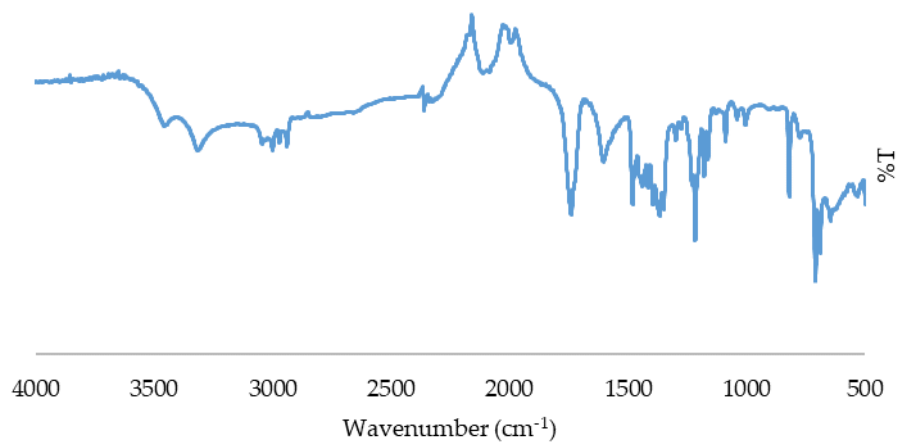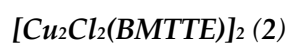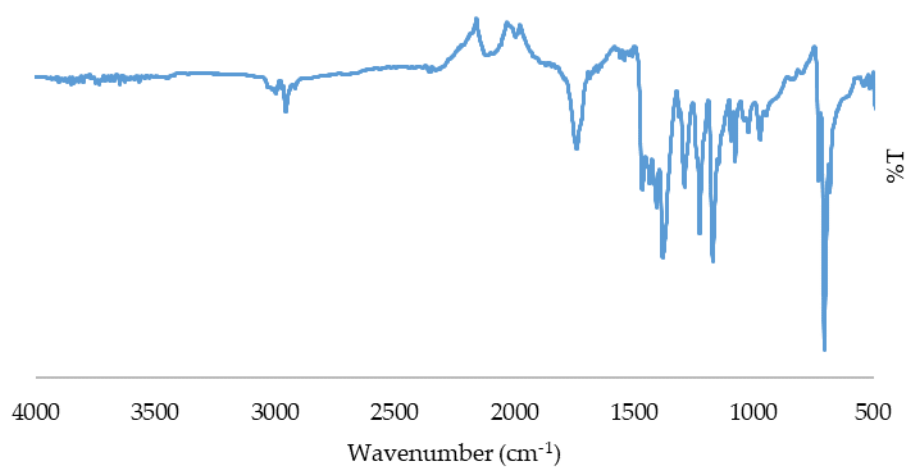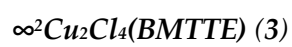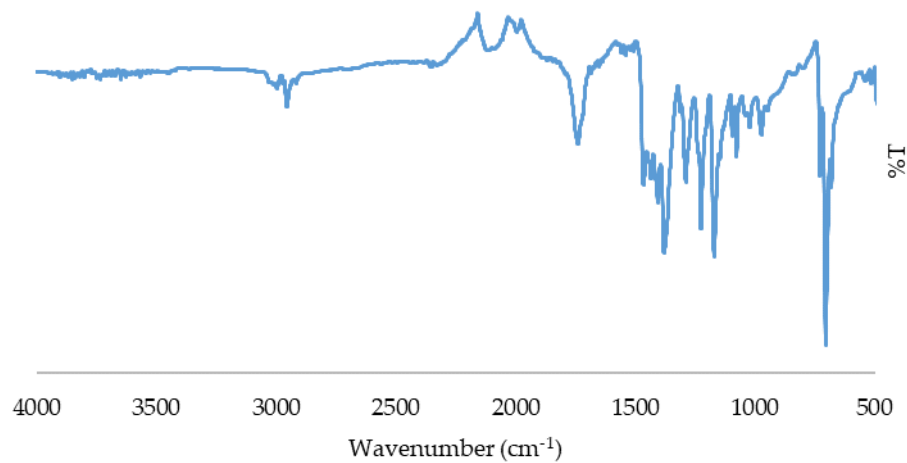

Figure S1: Infrared spectra (IR).

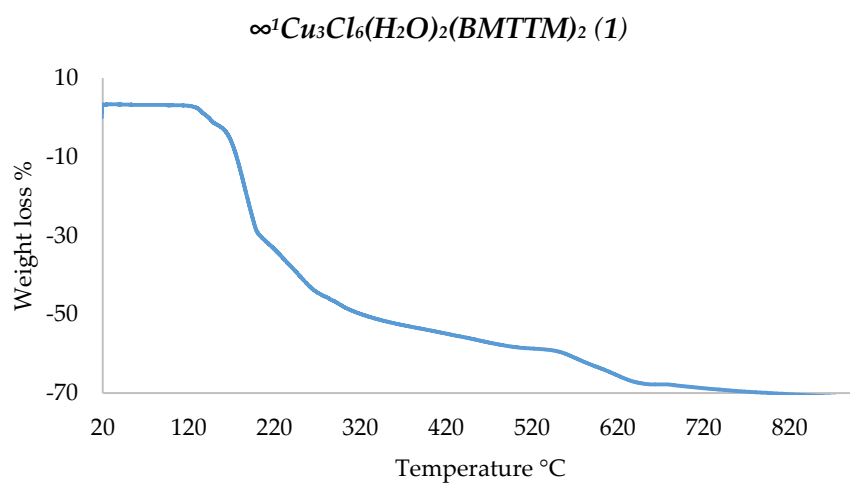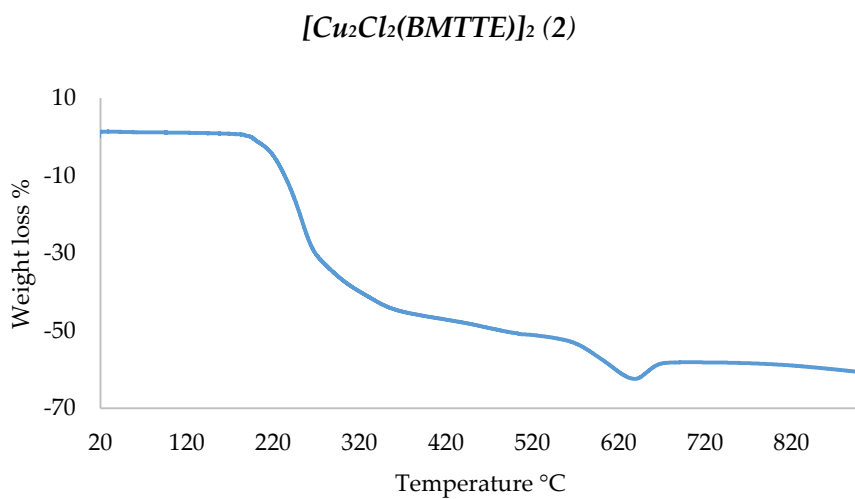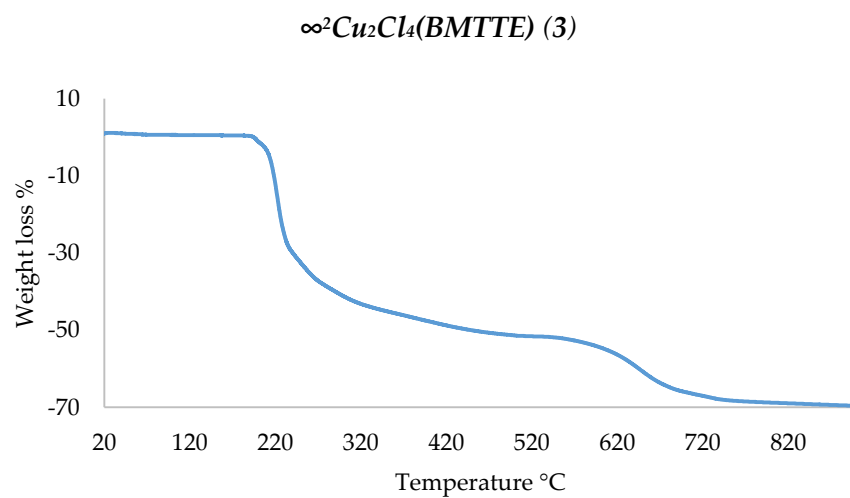

**Figure S2:** Thermogravimetric analysis (TGA).

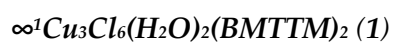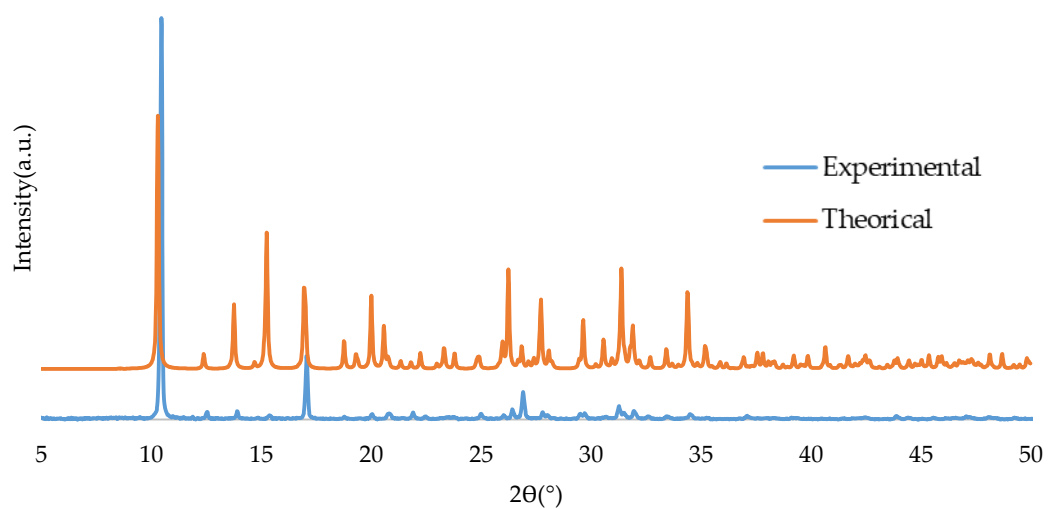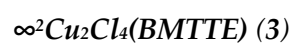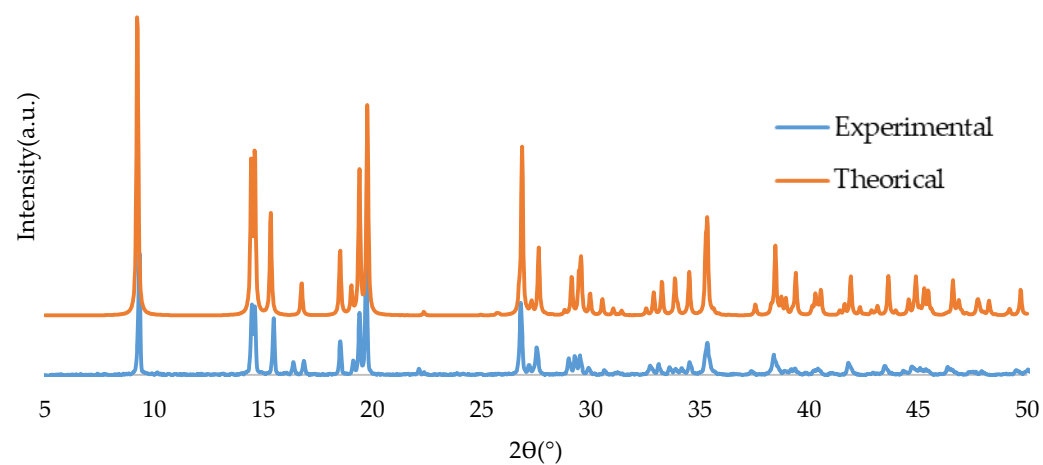

**Figure S3:** Powder X-Ray Diffraction (PXRD) comparison.

## 2. Crystallography

**Table S1:** Crystal data and structure refinement.

| Compound                                                    |             | 1                                                                                                             | 1·solv                                                                                                        | 2                                                                                              | 3                                                                |
|-------------------------------------------------------------|-------------|---------------------------------------------------------------------------------------------------------------|---------------------------------------------------------------------------------------------------------------|------------------------------------------------------------------------------------------------|------------------------------------------------------------------|
| Empirical formula                                           |             | C <sub>10</sub> H <sub>20</sub> Cl <sub>6</sub> Cu <sub>3</sub> N <sub>16</sub> O <sub>2</sub> S <sub>4</sub> | C <sub>18</sub> H <sub>32</sub> Cl <sub>6</sub> Cu <sub>3</sub> N <sub>20</sub> O <sub>2</sub> S <sub>4</sub> | C <sub>12</sub> H <sub>20</sub> Cl <sub>4</sub> Cu <sub>4</sub> N <sub>16</sub> S <sub>4</sub> | C <sub>3</sub> H <sub>5</sub> Cl <sub>2</sub> CuN <sub>4</sub> S |
| Formula weight                                              |             | 927.98                                                                                                        | 1092.19                                                                                                       | 912.64                                                                                         | 263.61                                                           |
| Crystal system                                              |             | Monoclinic                                                                                                    | Triclinic                                                                                                     | Monoclinic                                                                                     | Monoclinic                                                       |
| Space group                                                 |             | <i>P</i> 2 <sub>1</sub> / <i>n</i>                                                                            | <i>P</i> -1                                                                                                   | <i>P</i> 2 <sub>1</sub> / <i>n</i>                                                             | <i>C</i> 2/ <i>c</i>                                             |
| Unit cell dimensions                                        | <i>a</i> /Å | 6.6586(7)                                                                                                     | 6.7181(5)                                                                                                     | 10.1237(5)                                                                                     | 20.3164(18)                                                      |
|                                                             | <i>b</i> /Å | 12.8635(14)                                                                                                   | 12.9961(9)                                                                                                    | 9.5414(5)                                                                                      | 6.5444(6)                                                        |
|                                                             | <i>c</i> /Å | 17.4187(19)                                                                                                   | 12.9971(9)                                                                                                    | 14.4784(8)                                                                                     | 12.8543(11)                                                      |
|                                                             | $\alpha$ /° | -                                                                                                             | 64.067(2)                                                                                                     | -                                                                                              | -                                                                |
|                                                             | $\beta$ /°  | 99.657(3)                                                                                                     | 79.492(2)                                                                                                     | 93.650(2)                                                                                      | 109.493(3)                                                       |
|                                                             | $\gamma$ /° | -                                                                                                             | 82.134(2)                                                                                                     | -                                                                                              | -                                                                |
| Volume/Å <sup>3</sup>                                       |             | 1470.8(3)                                                                                                     | 1001.29(12)                                                                                                   | 1395.69(13)                                                                                    | 1611.1(2)                                                        |
| <i>Z</i> , $\rho_{\text{calc}}$ /g·cm <sup>-3</sup>         |             | 2/2.095                                                                                                       | 1/1.811                                                                                                       | 2/2.172                                                                                        | 8/2.174                                                          |
| F(000)                                                      |             | 922                                                                                                           | 549                                                                                                           | 904                                                                                            | 1040                                                             |
| Crystal size (mm <sup>3</sup> )                             |             | 0.126x0.023x0.021                                                                                             | 0.269x0.119x0.071                                                                                             | 0.411x0.186x0.051                                                                              | 0.071x0.051x0.045                                                |
| Abs. coeff. (mm <sup>-1</sup> )                             |             | 3.024                                                                                                         | 2.239                                                                                                         | 3.729                                                                                          | 3.567                                                            |
| $\theta$ Range (°)                                          |             | 2.372-28.434                                                                                                  | 2.958-30.576                                                                                                  | 2.385-28.339                                                                                   | 3.290-28.354                                                     |
| Max./min. transmission                                      |             | 0.7454/0.6425                                                                                                 | 0.7461/0.6127                                                                                                 | 0.7457/0.4839                                                                                  | 0.7457/0.7024                                                    |
| Reflections collected                                       |             | 18273                                                                                                         | 29257                                                                                                         | 29340                                                                                          | 19117                                                            |
| Independent reflections ( <i>R</i> <sub>int</sub> )         |             | 3688 (0.0523)                                                                                                 | 6158(0.0256)                                                                                                  | 3486 (0.0386)                                                                                  | 2015 (0.0255)                                                    |
| Final <i>R</i> indices [ <i>I</i> >2 $\sigma$ ( <i>I</i> )] |             | <i>R</i> 1 = 0.0494<br><i>wR</i> 2 = 0.1077                                                                   | <i>R</i> 1 = 0.0209<br><i>wR</i> 2 = 0.0501                                                                   | <i>R</i> 1 = 0.0212<br><i>wR</i> 2 = 0.0467                                                    | <i>R</i> 1 = 0.0196<br><i>wR</i> 2 = 0.0453                      |
